# Supplementary material for: Inflammation primes the murine kidney for recovery by activating AZIN1 adenosine-to-inosine editing
Source: PubMed Central journal article supplement (PMC11364396; doi:10.1172/jci180117), 2024-09-03

Uncut gels

Fig 3B

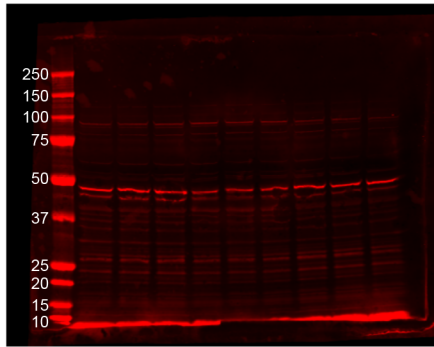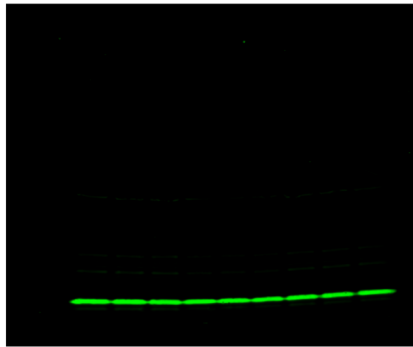

Fig 3C

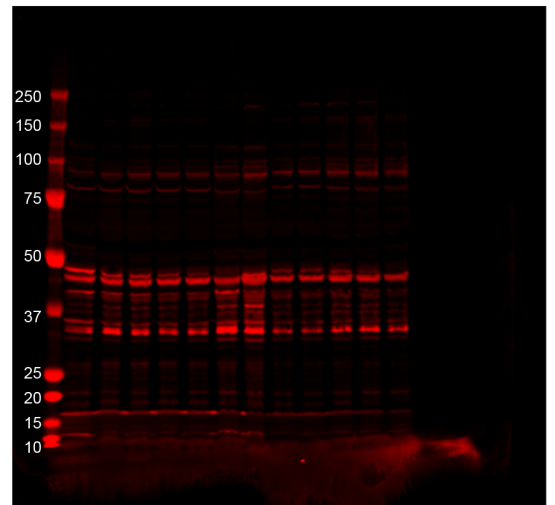

Fig 3I

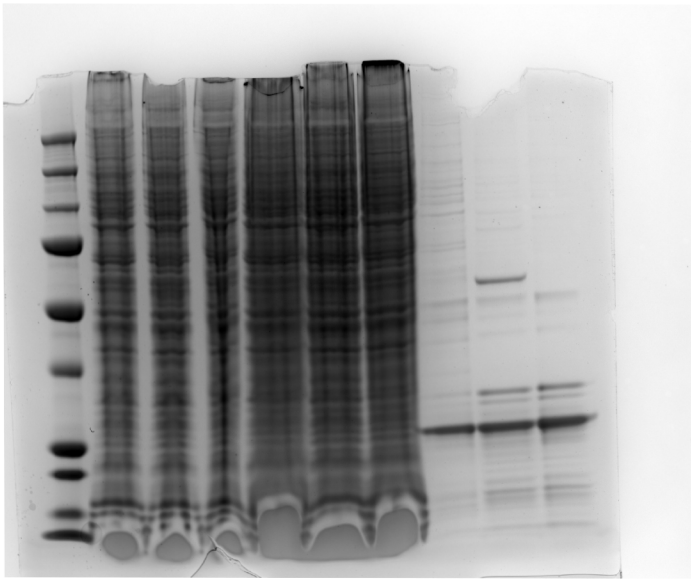

Fig 3I

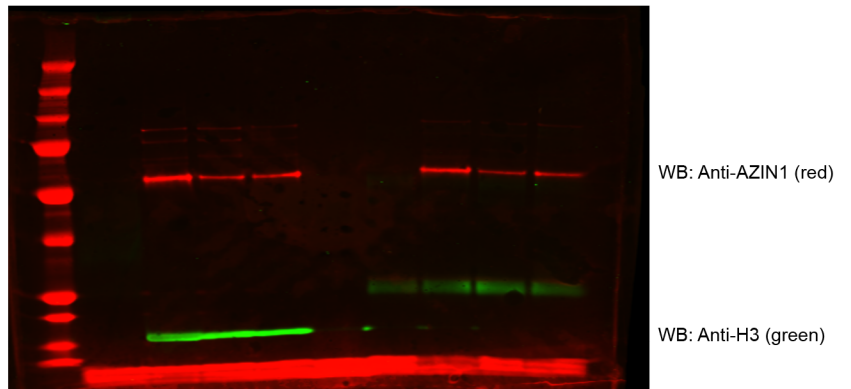

Fig 4F

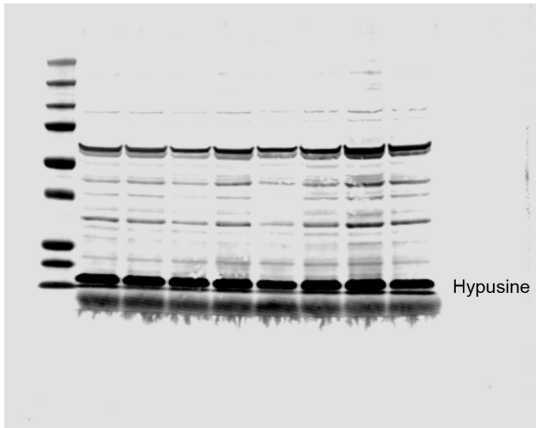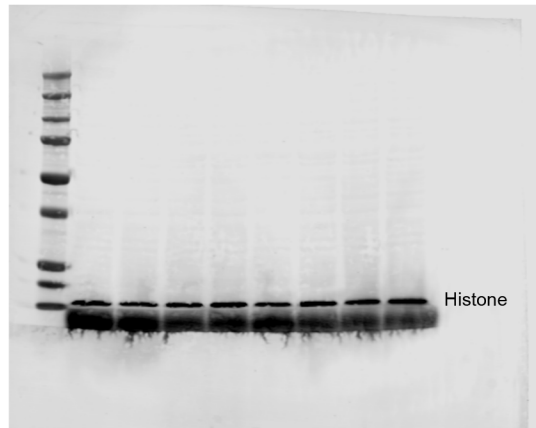

Fig 6A

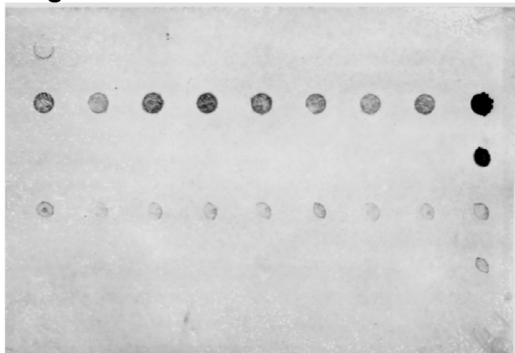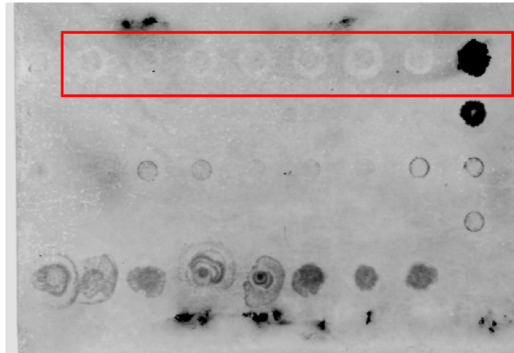

Uncut gels

Suppl Fig 5H

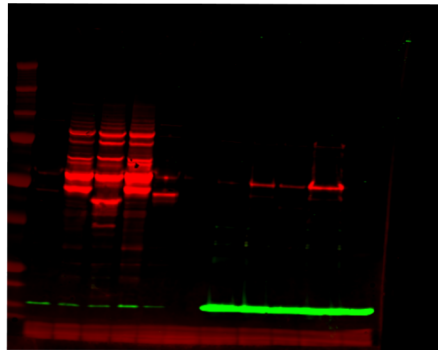

WB: Anti-AZIN1 (red)

WB: Anti-H3 (green)

Suppl Fig 8B

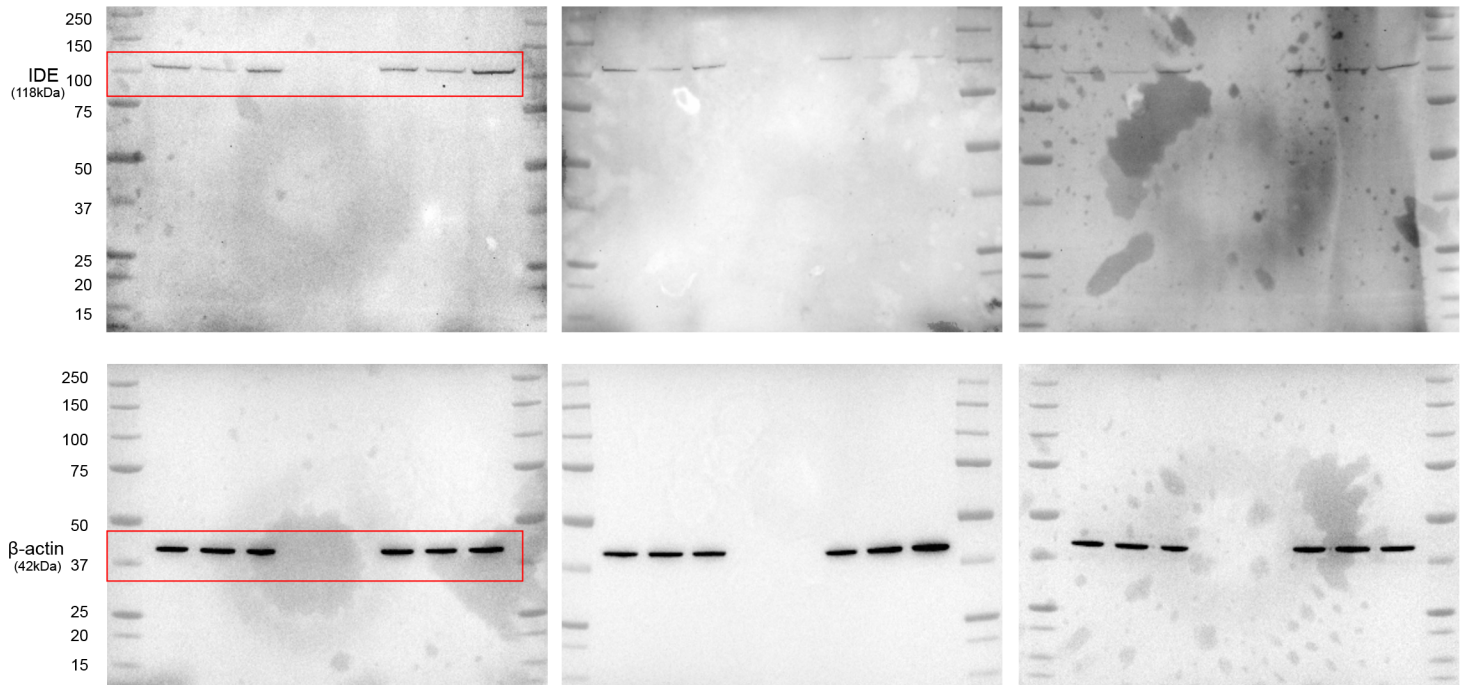

Uncut gels

Suppl Fig 11A

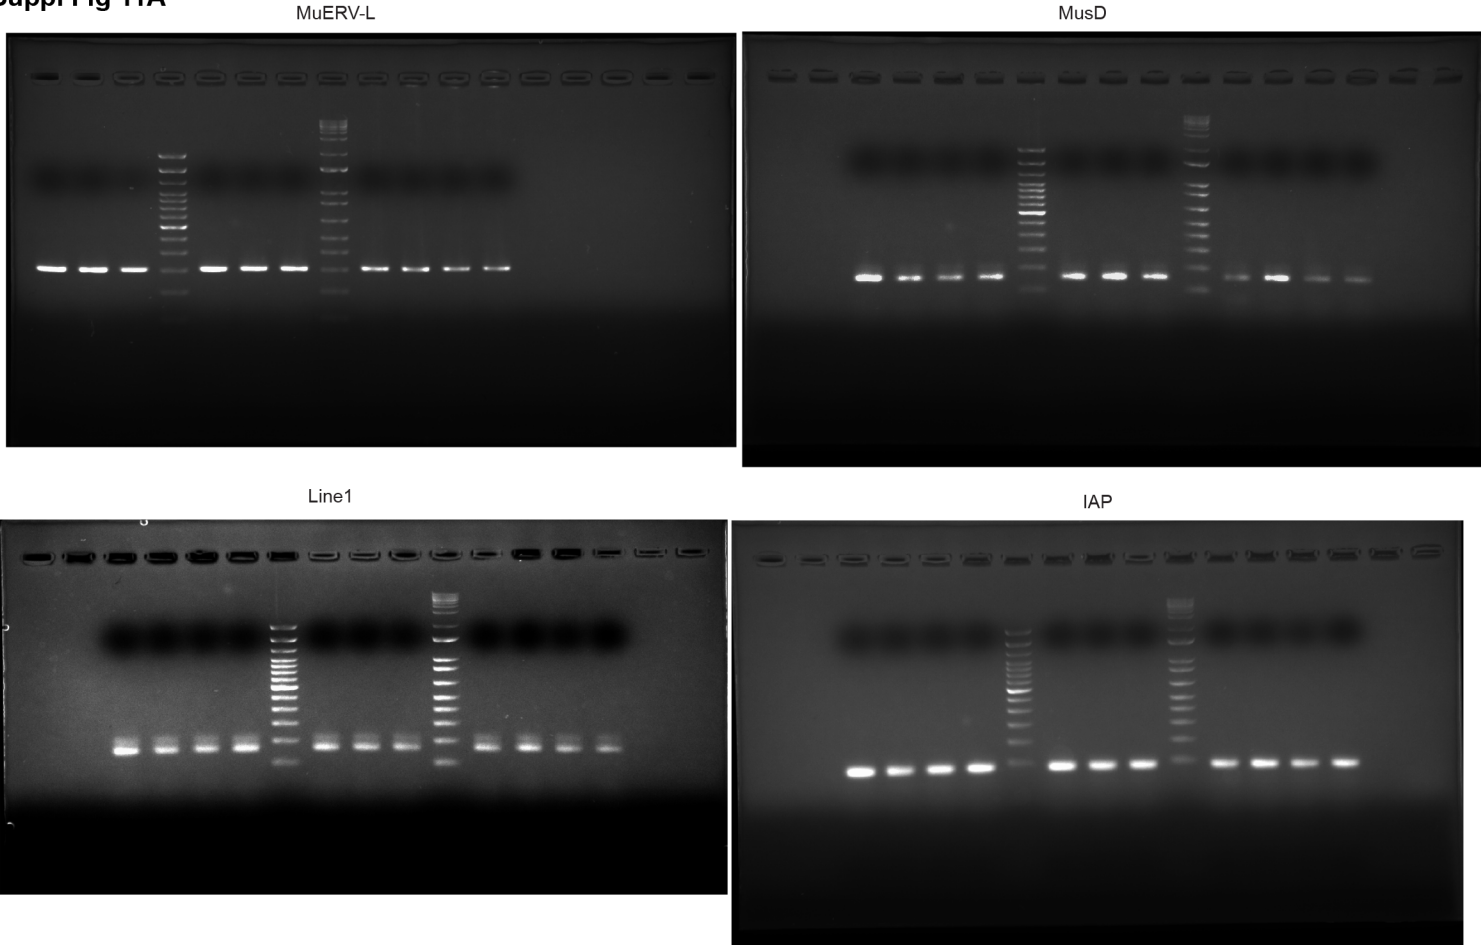

Suppl Fig 14A

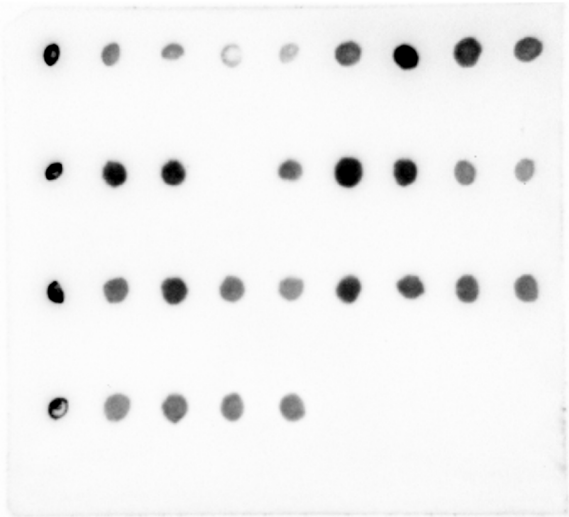

Supplement: jci-134-180117-s119.pdf [file jci-134-180117-s119.pdf]
